# Supplementary material for: RNA sequencing from neural ensembles activated during fear conditioning in the mouse temporal association cortex
Source: PubMed Central journal article supplement (PMC4997356; doi:10.1038/srep31753), 2016-08-25
Supplement: srep31753-s1.pdf [file srep31753-s1.pdf]

**Supplementary information**

**RNA sequencing from neural ensembles activated during fear conditioning in the mouse temporal association cortex**

Jin-Hyung Cho<sup>1</sup>, Ben S. Huang<sup>1,2</sup>, and Jesse M. Gray<sup>1</sup>

---

<sup>1</sup>Harvard Medical School, Genetics Department

<sup>2</sup>University of California, Los Angeles, Geffen School of Medicine, Neurology Department

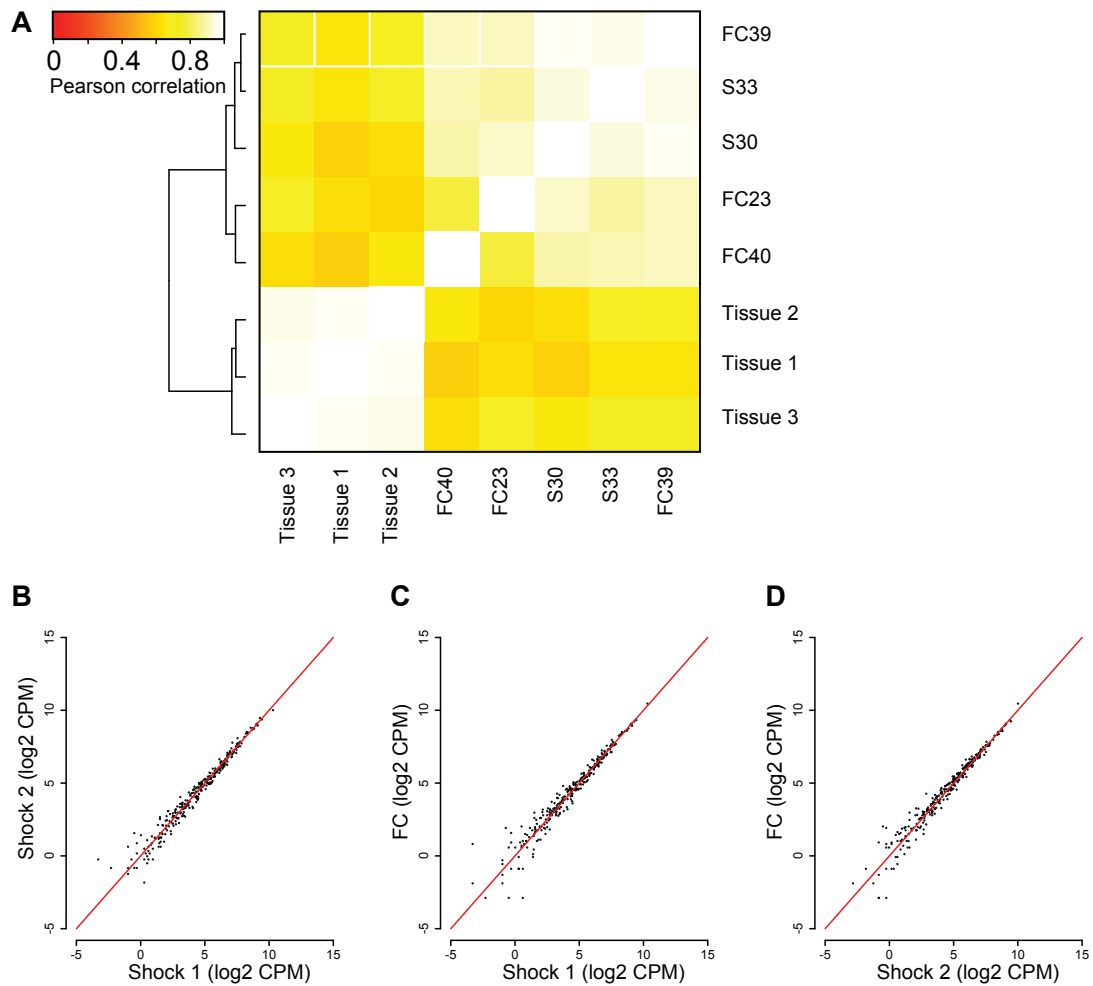

**Supplementary Figure 1. Activity-regulated genes (as a group) are expressed at equivalent levels in tissue from shock and fear conditioned mice. (A)** Pearson correlation matrix and hierarchical clustering, showing that bulk tissue samples and sorted cells cluster within their respective groups. **(B-D)** Scatterplots comparing bulk-tissue samples from three mice, where each data point is an activity- or experience-regulated gene (Methods). There are three tissue controls sequenced: shock (Tissue 2-3), and fear conditioned (FC, Tissue 1).

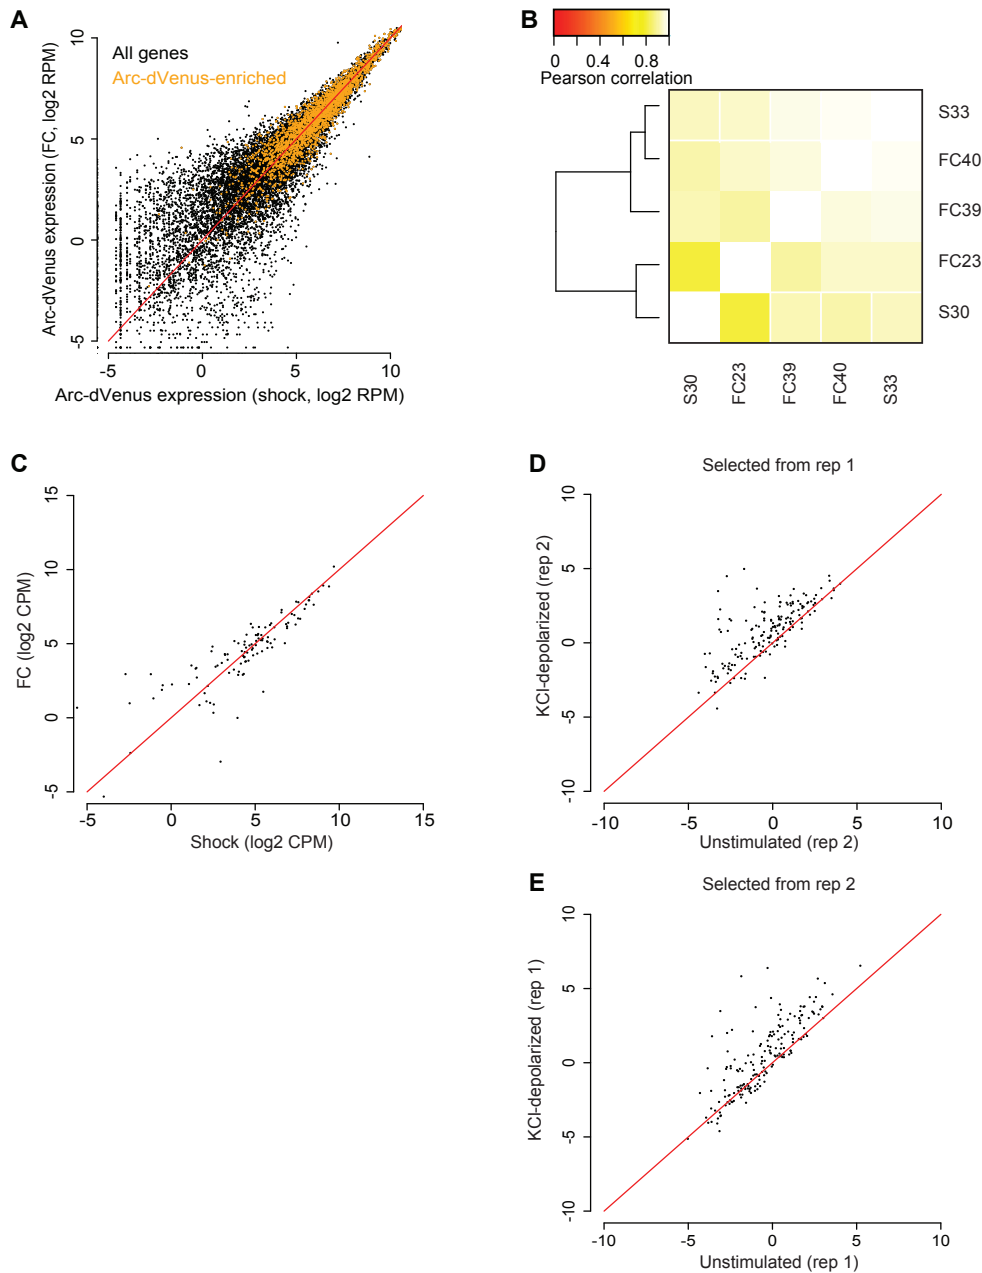

**Supplementary Figure 2. Fear conditioning and shock are indistinguishable by gene expression in *Arc-dVenus*<sup>+</sup> neurons** (A) A scatterplot of read counts per million for fear conditioned (FC, n = 3) versus shock (n = 2) conditions (each data point is a mean across replicates). (B) Pearson correlation matrix and hierarchical clustering of FC and shock samples, showing that FC and shock are indistinguishable based on these data. S is shock-only, and the number that follows S or FC is the number of cells isolated and sequenced. (C) Activity-regulated genes do not show a bias for expression in shock or FC conditions. Each condition is based on an average across two replicates. Activity-regulated genes are from<sup>12</sup>. (D-E) To demonstrate that RNA-Seq from just one or two replicates can in principle be used to detect systematic differences between conditions, we used one replicate of a KCl-depolarization experiment<sup>12</sup> to identify genes strongly biased toward upregulation in a second (panel D). Panel E shows that the second replicate can similarly be used to identify genes upregulated in the first.

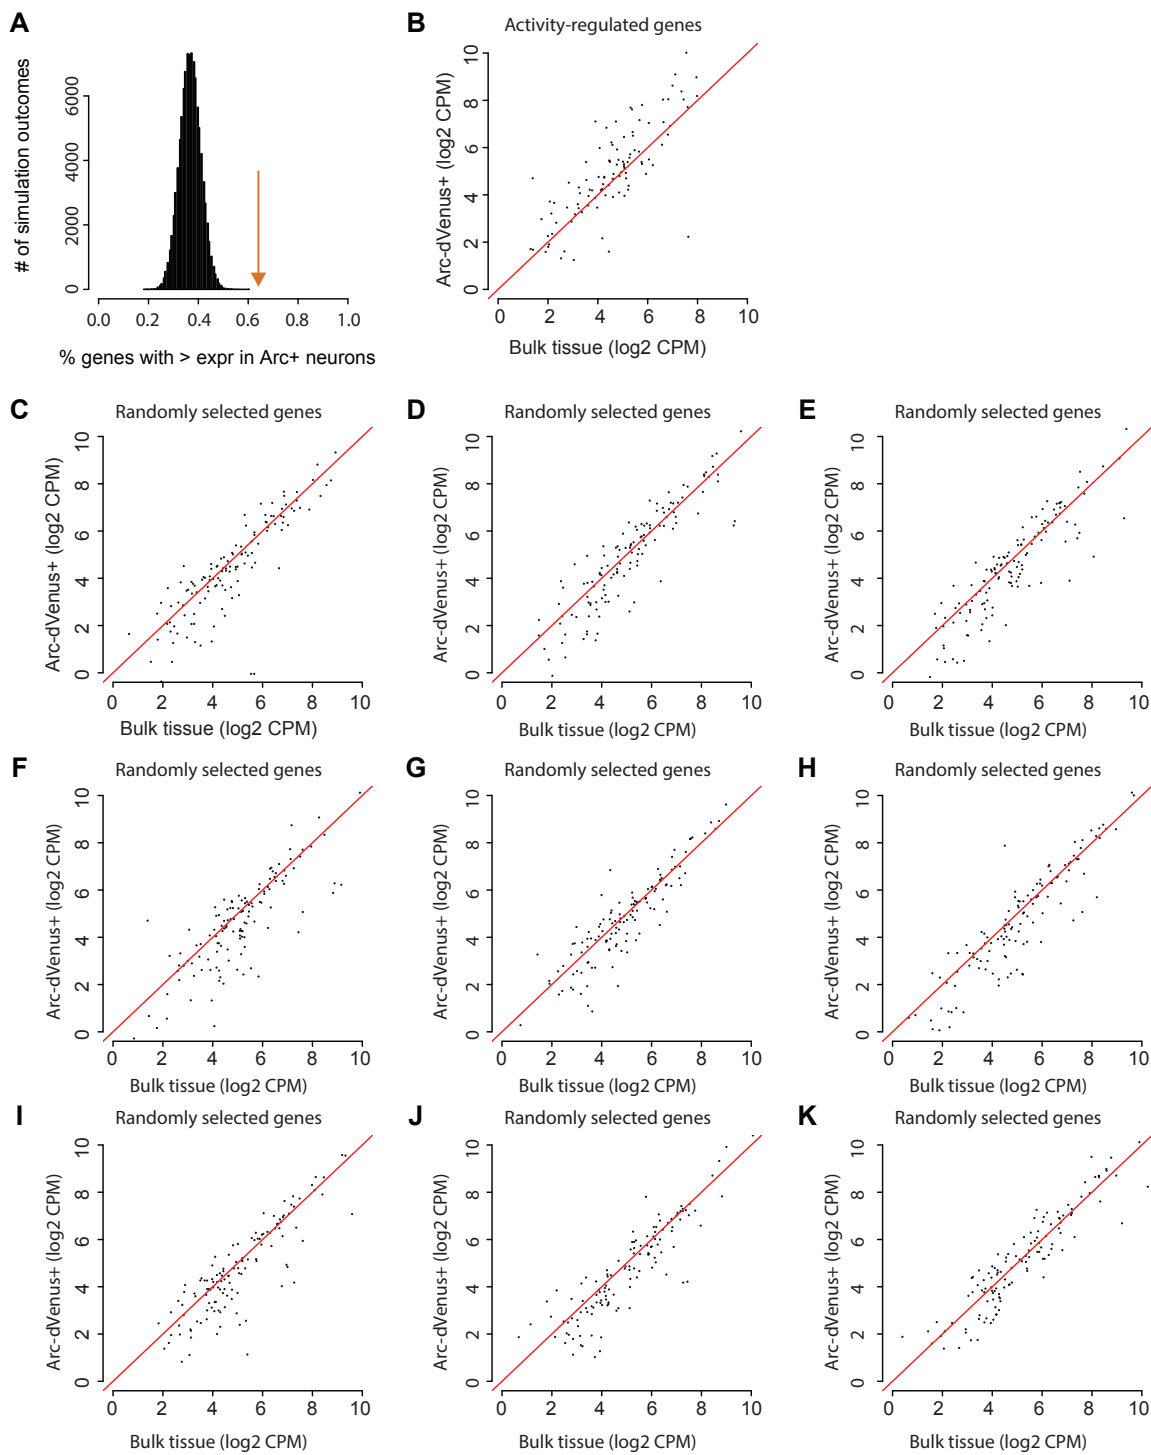

**Supplementary Figure 3.** (A) A histogram showing the % genes with greater expression in *Arc-dVenus+* neurons than bulk tissue, from 100,000 simulations in which random genes were chosen. The orange arrow shows the % of activity- or experience-regulated genes with greater expression in *Arc-dVenus+* neurons ( $p = 2 * 10^{-5}$  from the simulations). (B) Expression of activity- or experience-regulated genes in *Arc-dVenus+* cells versus bulk tissue. Each dot is an average from  $n = 5$  (sorted) and  $n = 3$  (bulk-tissue) samples. (C-K) *Arc-dVenus+* and bulk-tissue expression from nine simulations from panel A, each panel showing one simulation with randomly selected genes.

**Supplementary Table 1. Gene-by-gene RNA-Seq results.** Raw read counts, counts per million reads, log<sub>10</sub> fold-change (*Arc-dVenus* over tissue), *p* values, and RefSeq transcript ID for each gene for each sample. The first tab includes all genes analyzed. Subsequent tabs contain subsets of genes that are *Arc-dVenus*-enriched: those that are also activity-regulated (tab 2), visual stimulus-regulated (tab 3), known marker genes for excitatory neurons (tab 4), or genes enriched in *Fos*<sup>+</sup> hippocampal neurons (tab 5). *P* values are from edgeR<sup>44</sup>.
